# Supplementary material for: The synthesis and targeting of PPP-type copolymers to breast cancer cells: Multifunctional platforms for imaging and diagnosis
Source: Royal Society of Chemistry journal article supplement (doi:10.1039/c2jm30692a), 2012-01-01
Supplement: c2jm30692a.pdf [file c2jm30692a.pdf]

## SUPPORTING INFORMATION for

### **Synthesis and targeting of PPP-type copolymers to breast cancer cells: Multifunctional platforms for imaging and diagnosis**

*Demet Goen Colak, Ioan Cianga, Dilek Odaci Demirkol, Ozge Kozgus, E. Ilker Medine,*

*Serhan Sakarya, Perihan Unak, Suna Timur\*, and Yusuf Yagci\**

\*Corresponding Authors:

*Prof. Y. Yagci*

Department of Chemistry, Faculty of Science and Letters, Istanbul Technical University,  
Maslak, 34469, Istanbul, Turkey, E-mail: yusuf@itu.edu.tr

*Prof. S. Timur*

Biochemistry Department, Faculty of Science, Ege University, Bornova, 35100, Izmir,  
Turkey, E-mail: suna.timur@ege.edu.tr

### Spectral data for macromonomer and PPP copolymer;

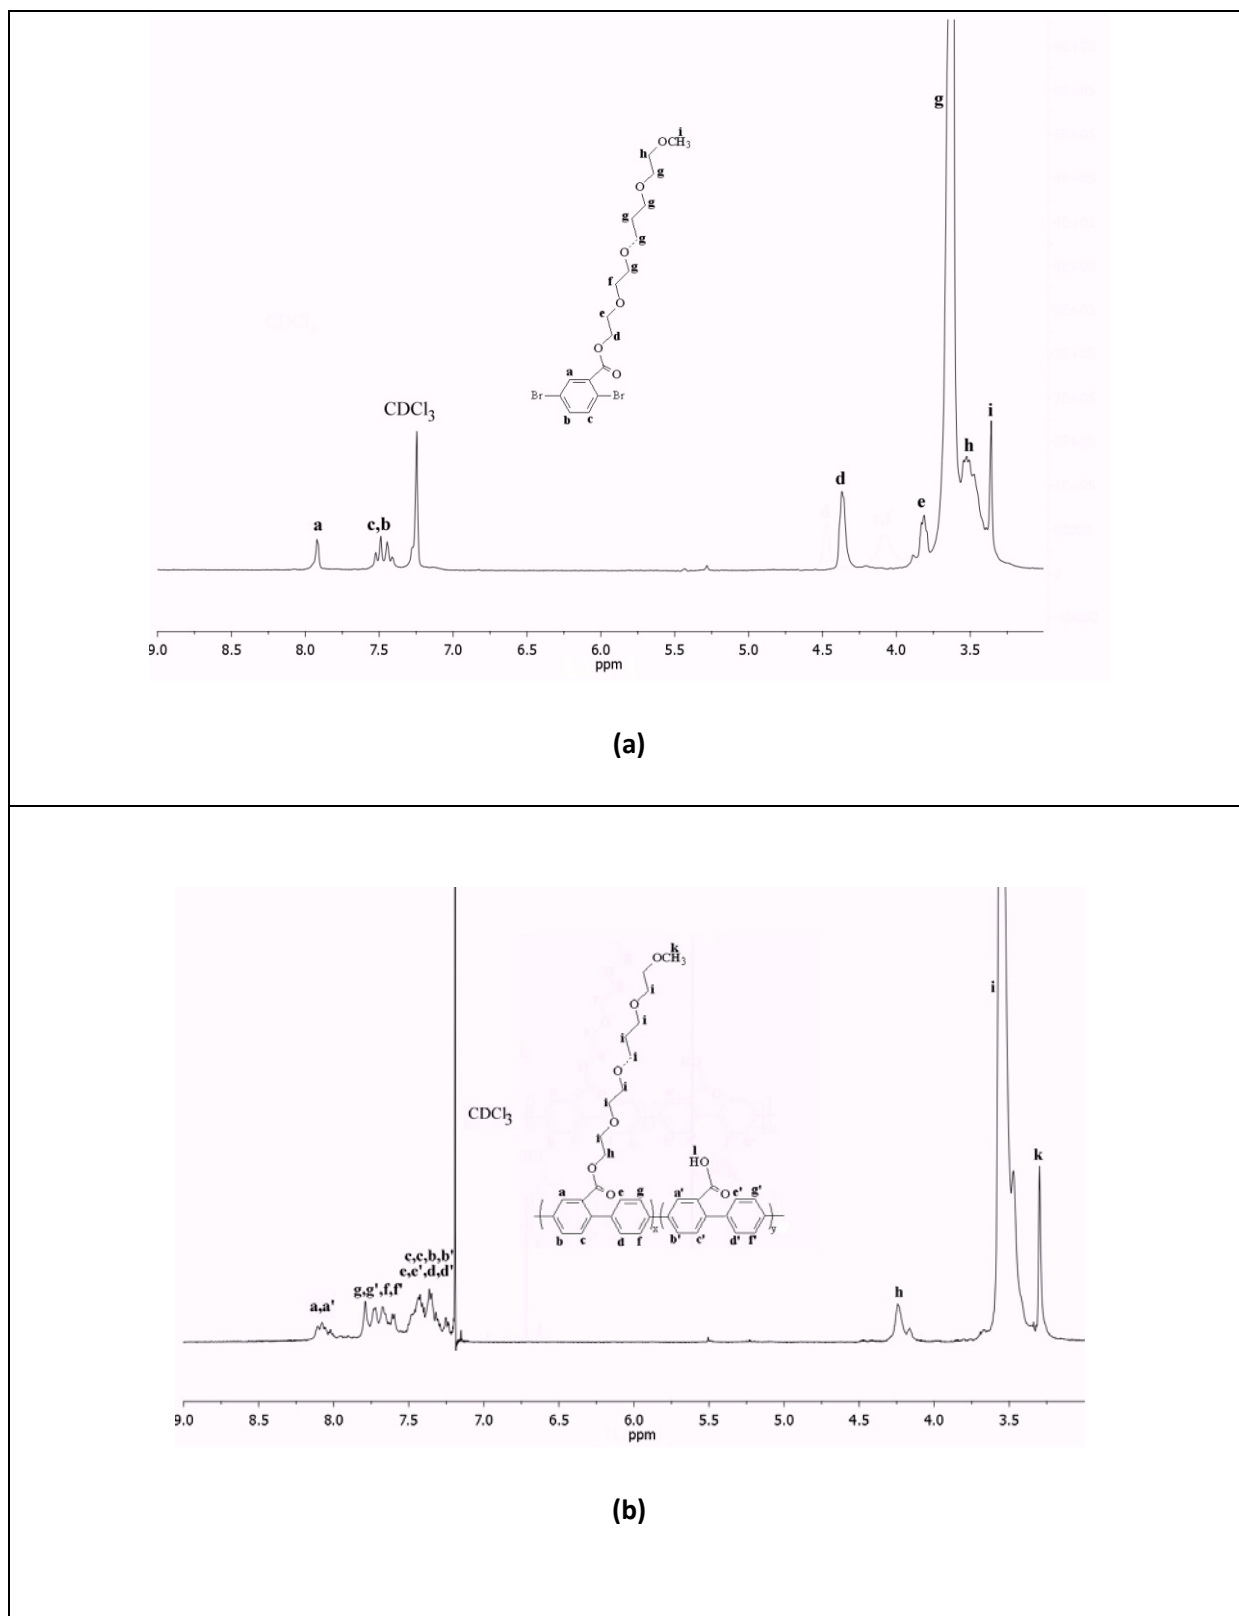

**Figure S1.** <sup>1</sup>H-NMR spectral data: (a) macromonomer, and (b) PPP copolymer in CDCl<sub>3</sub>.

## Cytotoxicity of PPP

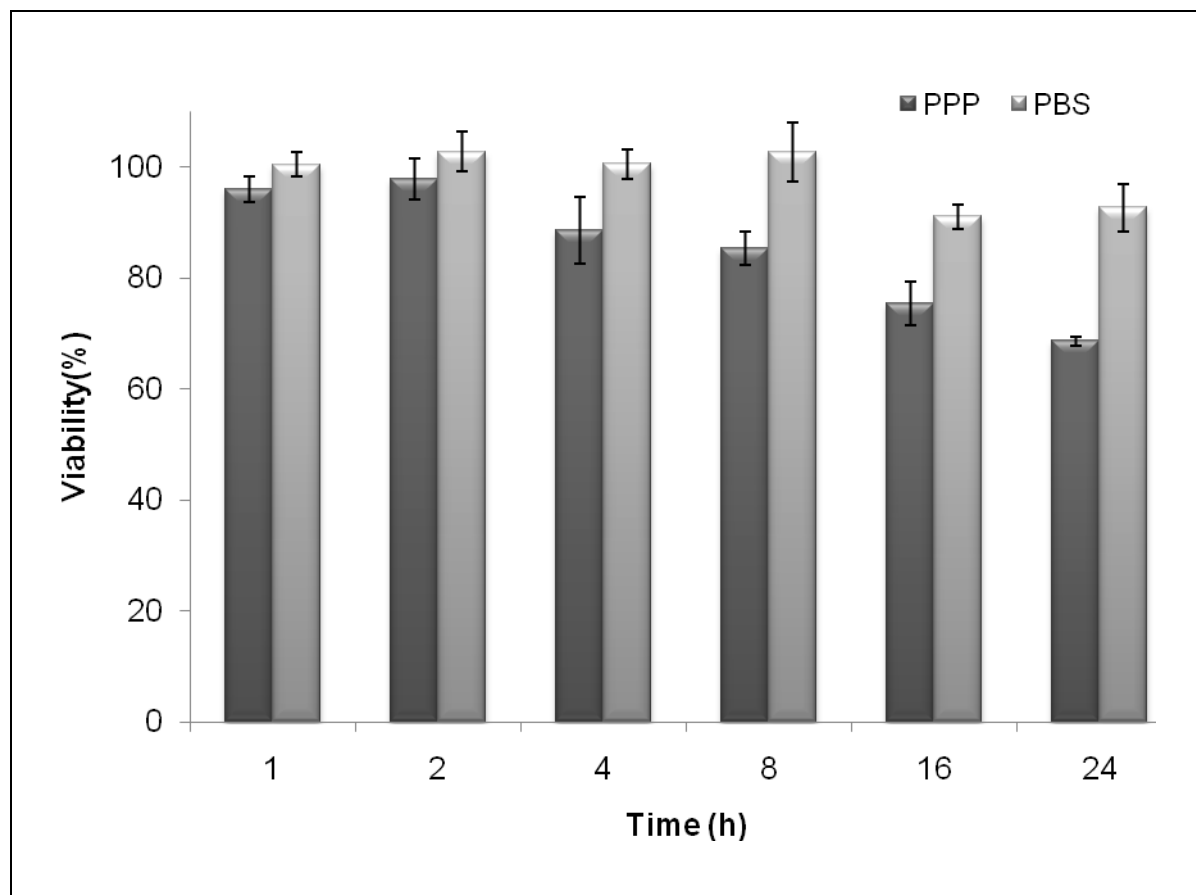

**Figure S2.** Time dependent cell viability of MCF7 cells.  $5 \times 10^5$  cells/mL in the presence of PPP (0.05 mg/mL in the medium) and PBS (pH 7.4, 50 mM) as a function of time by typical MTT assay. Error bars represent the standard deviation of three measurements].

## Fluorescence spectra of PPP after conjugation of Anti-MTDH, Lec and Anti- MTDH-Lec

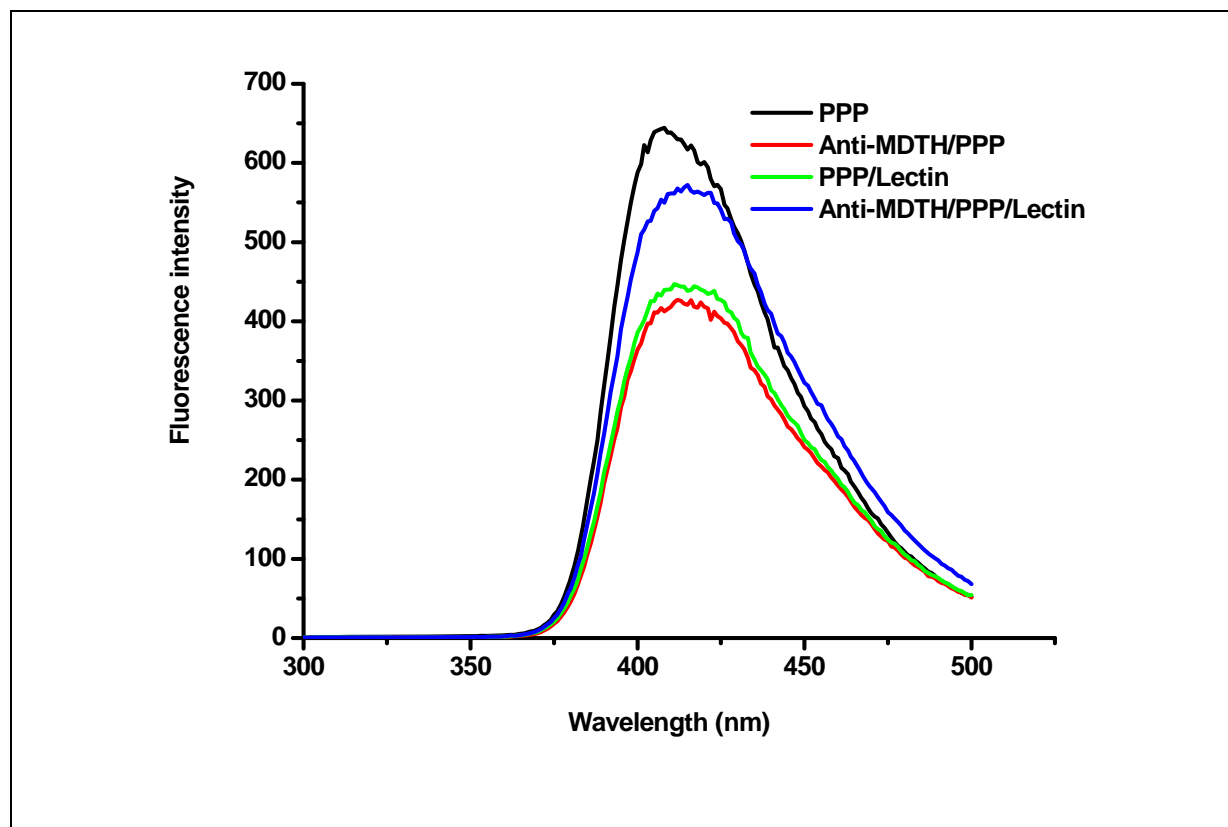

**Figure S3.** Fluorescence spectra of PPP after bioconjugation. Anti-MTDH, Lec and Anti-MTDH-Lec conjugation (in PBS pH 7.4), the excitation wavelength is 280 nm.
